# Supplementary material for: Molecular Characterization of a Trisegmented Mycovirus from the Plant Pathogenic Fungus Colletotrichum gloeosporioides
Source: PubMed Central journal article supplement (PMC5086604; doi:10.3390/v8100268), 2016-09-27
Supplement: viruses-08-00268-s001.pdf [file viruses-08-00268-s001.pdf]

# Supplementary Materials: Molecular Characterization of a Trisegmented Mycovirus from the Plant Pathogenic Fungus *Colletotrichum gloeosporioides*

Jie Zhong, Xi Dan Pang, Hong Jian Zhu, Bi Da Gao, Wen Kun Huang, and Qian Zhou

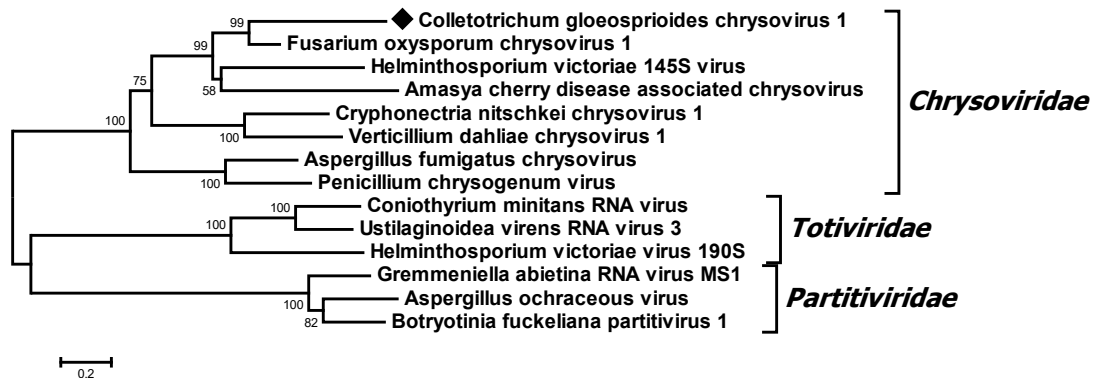

**Figure S1.** Phylogenetic analysis of the viral capsid protein (CP) amino acid sequences of *Colletotrichum gloeosporioides* chrysovirus 1 (CgCV1). The phylogenetic tree was generated using the neighbor-joining method in MEGA6 [24] (with a 1000-replicate bootstrap search). The values on the nodes refer to the percentage of bootstrap replicates supporting the branch. Respective GenBank accession numbers of these analyzed viruses are shown as follows: Amasya cherry disease-associated chrysovirus (YP\_001531162.1), *Aspergillus fumigatus* chrysovirus (CAX48751.2), *Aspergillus ochraceous* virus (ABV30676.1), *Botryotinia fuckeliana* partitivirus 1 (CAM33267.1), *Coniothyrium minitans* RNA virus (YP\_392466.1), *Cryphonectria nitschkei* chrysovirus 1 (ACT79252.1), *Fusarium oxysporum* chrysovirus 1 (ABQ58816.1), *Gremmeniella abietina* RNA virus MS1 (NP\_659028.1), *Helminthosporium victoriae* 145S virus (YP\_052859.1), *Helminthosporium victoriae* virus 190S (NP\_619669.2), *Penicillium chrysogenum* virus (YP\_392483.1), *Raphanus sativas* chrysovirus 1 (AFE83591.1), *Ustilaginoidea virens* RNA virus 3 (YP\_009004155.1), and *Verticillium dahliae* chrysovirus 1 (ADG21214.1).

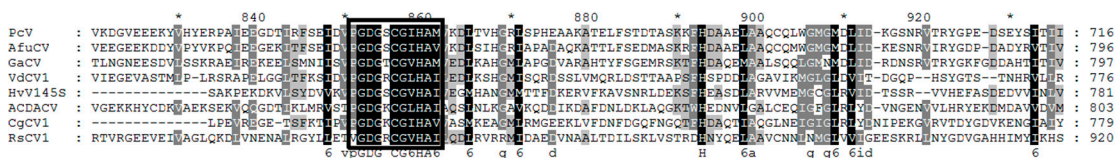

**Figure S2.** Multiple alignment of the amino acid sequences in the C-terminal region between the dsRNA3 of CgCV1 and other comparable regions of similar chrysovirus. The alignment was made using CLUSTAL X [23]. The conserved motif is indicated by the black box. The full names and GenBank accession numbers of these viruses are listed as follows: PcV, *Penicillium chrysogenum* virus (FN178515); AfuCV, *Aspergillus fumigatus* chrysovirus (FN178515); GAcV, *Grapevine chrysovirus* (AFX73020.1); VdCV1, *Verticillium dahliae* chrysovirus 1 (HM004070); HvV145S, *Helminthosporium victoriae* 145S virus (NC005980); ACDACV, *Amasya cherry disease-associated chrysovirus* (AJ781164); and RscV1, *Raphanus sativas* chrysovirus 1 (AFE83592.1).

Table S1. CgCV1-like sequences in the NCBI database.

| Database | Species                     | Contig/Singleton                              | dsRNA1       |              |                      | dsRNA2       |              |                     | dsRNA3       |              |                     |
|----------|-----------------------------|-----------------------------------------------|--------------|--------------|----------------------|--------------|--------------|---------------------|--------------|--------------|---------------------|
|          |                             |                                               | Coverage (%) | Identity (%) | E-Value              | Coverage (%) | Identity (%) | E-Value             | Coverage (%) | Identity (%) | E-value             |
| TSA      | <i>Noccaea caerulescens</i> | isotig06317_isogroup02885 (GASZ01006339.1)    | 67           | 37           | $7 \times 10^{-155}$ |              |              |                     |              |              |                     |
|          | <i>Noccaea caerulescens</i> | Nc_isotig05844_isogroup02412 (GASZ01005866.1) |              |              |                      | 53           | 26           | $1 \times 10^{-44}$ |              |              |                     |
|          | <i>Noccaea caerulescens</i> | Nc_isotig05933_isogroup02501 (GASZ01005955.1) |              |              |                      |              |              |                     | 57           | 30           | $7 \times 10^{-47}$ |
|          | <i>Camellia taliensis</i>   | CtaTrans37938 (GCRZ01034361.1)                | 65           | 29           | $7 \times 10^{-83}$  |              |              |                     |              |              |                     |
|          | <i>Camellia taliensis</i>   | CtaTrans13937 (GCRZ01012637.1)                | 19           | 28           | $2 \times 10^{-15}$  |              |              |                     |              |              |                     |
|          | <i>Camellia taliensis</i>   | CtaTrans29091 (GCRZ01026355.1)                |              |              |                      |              |              |                     | 38           | 27           | $5 \times 10^{-10}$ |
|          | <i>Artemisia annua</i>      | Artemis Contig26286 (EZ166880.1)              |              |              |                      |              |              |                     | 73           | 25           | $4 \times 10^{-39}$ |
|          | <i>Artemisia annua</i>      | Artemis Contig6582. Aml (EZ193025.1)          |              |              |                      |              |              |                     | 59           | 25           | $2 \times 10^{-25}$ |
|          | <i>Artemisia annua</i>      | Artemis Contig3687. Aylt (EZ206676.1)         |              |              |                      |              |              |                     | 47           | 25           | $8 \times 10^{-24}$ |
|          | <i>Artemisia annua</i>      | Madagascar Contig12667. Blt (EZ326121.1)      |              |              |                      |              |              |                     | 57           | 24           | $2 \times 10^{-23}$ |
|          | <i>Artemisia annua</i>      | Madagascar Contig9777. Mt (EZ283390.1)        |              |              |                      | 8            | 33           | $1 \times 10^{-4}$  |              |              |                     |
|          | <i>Artemisia annua</i>      | Artemis Contig7017. Aylt (EZ210006.1)         |              |              |                      | 6            | 36           | $4 \times 10^{-4}$  |              |              |                     |
|          | <i>Artemisia annua</i>      | Artemis Contig11776. Aml (EZ198219.1)         |              |              |                      | 16           | 27           | $6 \times 10^{-10}$ |              |              |                     |
|          | <i>Artemisia annua</i>      | Artemis Contig24510 (EZ165104.1)              |              |              |                      | 9            | 35           | $6 \times 10^{-7}$  |              |              |                     |
|          | <i>Artemisia annua</i>      | Uganda Contig20290 (EZ403795.1)               |              |              |                      | 7            | 35           | $7 \times 10^{-7}$  |              |              |                     |
|          | <i>Artemisia annua</i>      | ArtemisContig3870. Aml (EZ190313.1)           | 39           | 43           | $6 \times 10^{-11}$  |              |              |                     |              |              |                     |
|          | <i>Artemisia annua</i>      | Artemis Contig25044 (EZ165638.1)              | 23           | 50           | $6 \times 10^{-71}$  |              |              |                     |              |              |                     |
|          | <i>Artemisia annua</i>      | Artemis Contig4906. Aylt (EZ207895.1)         | 22           | 36           | $2 \times 10^{-41}$  |              |              |                     |              |              |                     |
|          | <i>Artemisia annua</i>      | Artemis Contig4484. Amlt (EZ237814.1)         | 16           | 43           | $8 \times 10^{-38}$  |              |              |                     |              |              |                     |
|          | <i>Artemisia annua</i>      | Artemis Contig24942 (EZ165536.1)              | 17           | 36           | $1 \times 10^{-34}$  |              |              |                     |              |              |                     |
|          | <i>Artemisia annua</i>      | Artemis Contig 9161. Aml (EZ195604.1)         | 18           | 37           | $1 \times 10^{-28}$  |              |              |                     |              |              |                     |
|          | <i>Artemisia annua</i>      | Artemis Contig7563. Aylt (EZ210552.1)         | 18           | 37           | $4 \times 10^{-28}$  |              |              |                     |              |              |                     |
|          | <i>Artemisia annua</i>      | Artemis Contig1636. Amlt (EZ234966.1)         | 18           | 36           | $5 \times 10^{-27}$  |              |              |                     |              |              |                     |
|          | <i>Artemisia annua</i>      | Uganda Contig17865 (EZ401370.1)               | 9            | 52           | $1 \times 10^{-25}$  |              |              |                     |              |              |                     |
|          | <i>Artemisia annua</i>      | Contig1233. Amlt (EZ234563.1)                 | 16           | 37           | $2 \times 10^{-24}$  |              |              |                     |              |              |                     |
|          | <i>Artemisia annua</i>      | Contig1198. Amlt (EZ234528.1)                 | 7            | 58           | $1 \times 10^{-22}$  |              |              |                     |              |              |                     |
|          | <i>Artemisia annua</i>      | Contig2871. Aml (EZ189314.1)                  | 15           | 33           | $1 \times 10^{-22}$  |              |              |                     |              |              |                     |
|          | <i>Artemisia annua</i>      | Madagascar Contig18240. Mt (EZ29185 3.1)      | 10           | 42           | $2 \times 10^{-20}$  |              |              |                     |              |              |                     |
|          | <i>Artemisia annua</i>      | Uganda Contig5658. Uht (EZ358497.1)           | 7            | 49           | $5 \times 10^{-19}$  |              |              |                     |              |              |                     |
|          | <i>Artemisia annua</i>      | Artemis Contig10169 (EZ150763.1)              | 14           | 31           | $9 \times 10^{-19}$  |              |              |                     |              |              |                     |
|          | <i>Artemisia annua</i>      | Madagascar Contig6103 (EZ263000.1)            | 5            | 63           | $7 \times 10^{-18}$  |              |              |                     |              |              |                     |
|          | <i>Artemisia annua</i>      | Artemis Contig6641 (EZ147235.1)               | 10           | 44           | $3 \times 10^{-17}$  |              |              |                     |              |              |                     |
|          | <i>Artemisia annua</i>      | Artemis Contig6413. Aylt (EZ209402.1)         | 6            | 54           | $5 \times 10^{-17}$  |              |              |                     |              |              |                     |
|          | <i>Artemisia annua</i>      | MadagascarContig19552. Mt (EZ293165.1)        | 12           | 35           | $1 \times 10^{-15}$  |              |              |                     |              |              |                     |
|          | <i>Artemisia annua</i>      | Contig7536 (EZ148130.1)                       | 15           | 31           | $2 \times 10^{-14}$  |              |              |                     |              |              |                     |
|          | <i>Artemisia annua</i>      | Artemis Contig5462. Amlt (EZ238792.1)         | 10           | 32           | $1 \times 10^{-13}$  |              |              |                     |              |              |                     |
|          | <i>Artemisia annua</i>      | Uganda Contig21105 (EZ404610.1)               | 12           | 36           | $1 \times 10^{-12}$  |              |              |                     |              |              |                     |
|          | <i>Artemisia annua</i>      | Artemis Contig2500. Ac (EZ179024.1)           | 11           | 32           | $3 \times 10^{-12}$  |              |              |                     |              |              |                     |

|     |                                   |                                                                                                  |    |    |                     |    |    |                     |                     |
|-----|-----------------------------------|--------------------------------------------------------------------------------------------------|----|----|---------------------|----|----|---------------------|---------------------|
|     | <i>Artemisia annua</i>            | Artemis Contig947. Ac (EZ177471.1)                                                               | 6  | 55 | $5 \times 10^{-12}$ |    |    |                     |                     |
|     | <i>Artemisia annua</i>            | Madagascar Contig7630. Mt (EZ281243.1)                                                           | 9  | 34 | $7 \times 10^{-11}$ |    |    |                     |                     |
|     | <i>Artemisia annua</i>            | Artemis Contig6864. Aylt (EZ209853.1)                                                            | 5  | 48 | $4 \times 10^{-10}$ |    |    |                     |                     |
|     | <i>Artemisia annua</i>            | Artemis Contig1606. Amlt (EZ234936.1)                                                            | 10 | 32 | $1 \times 10^{-7}$  |    |    |                     |                     |
|     | <i>Artemisia annua</i>            | Uganda Contig3311. Ulm (EZ369860.1)                                                              | 7  | 37 | $2 \times 10^{-7}$  |    |    |                     |                     |
|     | <i>Artemisia annua</i>            | Uganda Contig2972. Ulm (EZ369521.1)                                                              | 6  | 42 | $4 \times 10^{-7}$  |    |    |                     |                     |
|     | <i>Artemisia annua</i>            | Artemis Contig1982. Aylt (EZ204971.1)                                                            | 7  | 36 | $1 \times 10^{-6}$  |    |    |                     |                     |
|     | <i>Artemisia annua</i>            | Artemis Contig1184 (EZ141778.1)                                                                  | 5  | 40 | $2 \times 10^{-6}$  |    |    |                     |                     |
|     | <i>Allium fistulosum</i>          | contig: AFU_22548 (FX576273.1)                                                                   | 17 | 31 | $1 \times 10^{-21}$ |    |    |                     |                     |
|     | <i>Allium fistulosum</i>          | contig: AFU_01016 (FX554741.1)                                                                   |    |    |                     | 52 | 26 | $5 \times 10^{-38}$ |                     |
|     | <i>Allium fistulosum</i>          | contig: AFU_00430 (FX554155.1)                                                                   |    |    |                     |    | 48 | 31                  | $2 \times 10^{-43}$ |
|     | <i>Bemisia tabaci</i>             | comp13683_c0_seq1 (GARP01025880.1)                                                               | 39 | 21 | $3 \times 10^{-5}$  |    |    |                     |                     |
|     | <i>Caligus rogercresseyi</i>      | tsa-crog-ngs-11124173 (GAZX01040384.1)                                                           | 47 | 23 | $2 \times 10^{-10}$ |    |    |                     |                     |
|     | <i>Caligus rogercresseyi</i>      | tsa-crog-ngs-11124172 (GAZX01040383.1)                                                           | 47 | 23 | $2 \times 10^{-10}$ |    |    |                     |                     |
|     | <i>Caligus rogercresseyi</i>      | tsa-crog-ngs-11124002 (GAZX01040226.1)                                                           | 45 | 23 | $3 \times 10^{-8}$  |    |    |                     |                     |
|     | <i>Humulus lupulus var</i>        | contig: comp13164_2_c0_seq1 (LA332420.1)                                                         | 27 | 26 | $3 \times 10^{-10}$ |    |    |                     |                     |
|     | <i>Grylloblatta bifratrilecta</i> | s13623_L_120298_0 (GAWP01013600.1)                                                               | 15 | 31 | $4 \times 10^{-10}$ |    |    |                     |                     |
|     | <i>Grylloblatta bifratrilecta</i> | s17247_L_150202_0 (GAWP01017218.1)                                                               | 32 | 24 | $2 \times 10^{-7}$  |    |    |                     |                     |
|     | <i>Grylloblatta bifratrilecta</i> | s7948_L_90492_0 (GAWP01007931.1)                                                                 | 14 | 30 | $4 \times 10^{-8}$  |    |    |                     |                     |
|     | <i>Phakopsora pachyrhizi</i>      | Thai1Pp_contig01637 (GACM01002541.1)                                                             | 25 | 24 | $1 \times 10^{-7}$  |    |    |                     |                     |
|     | <i>Phakopsora pachyrhizi</i>      | Thai1Pp_contig04037 (GACM01003506.)                                                              | 28 | 25 | $4 \times 10^{-6}$  |    |    |                     |                     |
|     | <i>Uromyces appendiculatus</i>    | Ua_contig01686 (GACI01004215.1)                                                                  | 19 | 28 | $9 \times 10^{-7}$  |    |    |                     |                     |
|     | <i>Teleopsis dalmanni</i>         | Td_comp6756_c0_seq1 (GBBP01176362.1)                                                             | 20 | 26 | $1 \times 10^{-6}$  |    |    |                     |                     |
|     | <i>Lepeophtheirus salmonis</i>    | lsal-pac-6261972 (JP332015.1)                                                                    | 18 | 25 | $7 \times 10^{-6}$  |    |    |                     |                     |
|     | <i>Mengenilla moldrzyki</i>       | contig03151 (JP089782.1)                                                                         | 27 | 22 | $8 \times 10^{-06}$ |    |    |                     |                     |
|     | <i>Acanthosoma haemorrhoidale</i> | C369386 (GAUV01086077.1)                                                                         | 6  | 38 | $1 \times 10^{-5}$  |    |    |                     |                     |
|     | <i>Vigna radiata</i>              | Vr16063_c0 (GBXO01026945.1)                                                                      |    |    |                     | 21 | 33 | $8 \times 10^{-18}$ |                     |
|     | <i>Colobanthus quitensis</i>      | Colobanthus_quitensis_contig_31970_1 (GCIB01032448.1)                                            |    |    |                     | 18 | 30 | $8 \times 10^{-12}$ |                     |
| EST | <i>Zinnia violacea</i>            | AU307126 cDNA clone Z16843 (AU307126.1)                                                          | 16 | 49 | $4 \times 10^{-45}$ |    |    |                     |                     |
|     | <i>Zinnia violacea</i>            | FM881064 SSHSTS0 cDNA clone SSHSTS0 6xxxA02F2 (FM881064.1)                                       |    |    |                     |    | 12 | 31                  | $5 \times 10^{-5}$  |
|     | <i>Zinnia violacea</i>            | FM881063 SSHSTS0 cDNA clone SSHSTS06 xxxA02F1 (FM881063.1)                                       |    |    |                     |    | 12 | 31                  | $5 \times 10^{-5}$  |
|     | <i>Zinnia violacea</i>            | AU307096 cDNA clone Z16810 (AU307096.1)                                                          |    |    |                     |    | 28 | 23                  | $2 \times 10^{-8}$  |
|     | <i>Dactylis glomerata</i>         | BG04060A1C03.f1 BG04- primary and normalized libraries (HO148595.1)                              | 11 | 46 | $1 \times 10^{-30}$ |    |    |                     |                     |
|     | <i>Dactylis glomerata</i>         | BG04058A1B02.r1 BG04-cDNA (HO147684.1)                                                           |    |    |                     |    | 16 | 29                  | $2 \times 10^{-7}$  |
|     | <i>Lepeophtheirus salmonis</i>    | EST_lsal_af_785797 lsalaf whole Lepeophtheirus salmonis (Pacific) cDNA clone lsal_af_1_85_rev 5' | 18 | 25 | $5 \times 10^{-6}$  |    |    |                     |                     |
|     | <i>Artemisia annua</i>            | CATA453.fwd CATA A Tanzanian, cDNA cloneCATA453 5' (EY047151.1)                                  |    |    |                     |    | 17 | 29                  | $2 \times 10^{-6}$  |

|            |                            |                                                                                                                                                   |    |    |                     |
|------------|----------------------------|---------------------------------------------------------------------------------------------------------------------------------------------------|----|----|---------------------|
| NR         | <i>Solanum tuberosum</i>   | Solanum tuberosum uncharacterized<br>LOC102579694 (LOC102579694)<br>(XM_006340898.1)                                                              | 73 | 24 | $5 \times 10^{-37}$ |
|            | <i>Medicago truncatula</i> | Medicago truncatula hypothetical protein<br>(MTR_5g084970) (XM_003616807.1)                                                                       | 63 | 25 | $5 \times 10^{-28}$ |
|            | <i>Medicago truncatula</i> | Medicago truncatula chromosome 5 clone<br>mth2-75o19 (CT573055.2)                                                                                 | 66 | 25 | $9 \times 10^{-27}$ |
|            | <i>Medicago truncatula</i> | Medicago truncatula chromosome 5 clone<br>mte1-85h10 (CR936947.2)                                                                                 | 66 | 25 | $9 \times 10^{-27}$ |
|            | <i>Medicago truncatula</i> | Medicago truncatula hypothetical protein<br>(MTR_5g084940) (XM_003616804.1)                                                                       | 48 | 24 | $2 \times 10^{-19}$ |
|            | <i>Trifolium pratense</i>  | Trifolium pratense genome assembly<br>redclover, chromosome:chr4 (LN846352.1)                                                                     | 39 | 28 | $1 \times 10^{-21}$ |
| HTGS       | <i>Solanum tuberosum</i>   | Solanum tuberosum strain Diploid genotype<br>RH89-039-16 chromosome 9 clone RH204J10,<br>(AC239340.1)                                             | 73 | 24 | $2 \times 10^{-37}$ |
| chromosome | <i>Solanum tuberosum</i>   | Solanum tuberosum cultivar DM 1-3 516 R44<br>unplaced genomic scaffold, SolTub_3.0<br>scf00020, whole genome shotgun sequence<br>(NW_006238946.1) | 73 | 24 | $3 \times 10^{-36}$ |
|            | <i>Medicago truncatula</i> | Medicago truncatula chromosome 5<br>(NC_016411.1)                                                                                                 | 66 | 25 | $3 \times 10^{-26}$ |

Note: these similar sequences were collected by tBLASTn searches against the NCBI databases including nucleotide collection [nr/nt], high-throughput genomic sequences [HTGS], non-human, non-mouse expressed sequence tags [EST], and transcriptome shotgun assembly [TSA].

**Genome sequences of Colletotrichum gloeosporioides chrysovirus 1 (CgCV1):**

&gt;dsRNA1

TGATAAAAATAGAAATTAATATTTTCGTTTTATCCTAGTGAAGTTGCCACGTAAACAACCTCT  
GAACAAAATGTCGGGACGAATGACTAGAAATGAGTCAAACCTCAAAGAAGAAAGTGGAGCA  
AGCAGCGGCAAATATACAAGCGAGAGTGCAGTATTTTGGATCTGACAAAGGTAGGATAGAC  
TTTACTGCTGAAGTTCTGTCTTCGATGGAAAGATACGAAAAGAGGAGGAGAGATAACTTCTT  
TGCGATCGTTATGCCGTCAGGTTCTGGTAAAACACTCAACTTTGTGACAAGTATGGATTTATCGA  
CGTTGACAGATTGTGCACAATAGCGGAACACGAGTACCTGAATGACCTAAGGCTGGATGCT  
ATCAACGGGAAAGATACCTGGGATGAGCACAACAAAGTGTGGTTCGAGTTGTTGAACGAA  
ACTCTGGACCTGATGGAGTTCAAGGAGGACACGTTATCATGGTGCAGAGTGAGGTAATAG  
CGTTGGGCATAGGGGCACTGCCTCTGGCTGGGTTTCATCTTAGATGATAAGACATATCAGATG  
GTGTATAACCAGAAAGTCGAAAGAGGGAATAGAGCAGGTGCTCTGCTAATGGCTGAGAAC  
AGAGCCCAGTTTCTGAGCAACACGAACATAGTGTGAAAACAAAGAAGATGGTGAGAGGA  
TTTGAGATGATGGAAGCAAAGGTGATAGAGACTCTGAATGTGAATGAAATACCATGCGCTTG  
CCCGCTAAAATTCTCATTGCGATATCCGGGATACGGTTACGGCCCTTCTGTTCTGATTGGGTT  
ACGAAAGGGGAGCGAAAGTACATGAATGTTGTGGAATTGTTGGACCTGCATAGGTCAGGGA  
TGGTGCCCAAACAGTGCATGGATTACTTCATGAGGGACCCAGAAATTCCTGCTTCTTACGGA  
TTCGGCGTGAGAGACAATGAGTGGTCACAGTTCTTCGCAAACATGAGGGCTTCTATTGGCTC  
ACCTCAGAACTTCGACCCAAGGGATGATCTGGGGAAGGTGTTCCCATACAAATACGAAAAG  
AACTTGACGAGGGCGAACATGACAGTGAGTAGATTACAGAAAGGCATGGAAGTCTTGAC  
GATGAGGAGGCTTATGAGATAGCGTCACATCATGTGGGCAAGCCAAACAATTTTGTGACAG  
CAATATTGTGTTACTGGCAAGGGGCGAGGTAGATTCTCAAAGTTCAGAGAGTTCATCAAGAA  
GGCAATGTGTGTAACCTTTAGATTCTGGGGACAGGTGTTCAAAGAGTTCACAATTTAATAA  
GAGTATCAGACTATTTCTTTGGAGAAAAAGTGRGCGAAGAGGAAAGGCATAGAATGATGTA  
CTTCGACCAGATGTTGGGGAAGGAAGTGGAGGATGCGGACTGGAAGCAGGAGATTGAGGA  
TAGAACTTGGGCATATGAATTGCCAGACCACAAGTCTTACAACGATGATATACAAATGTGGA  
CACAAGAACAATACATGGTCGATTTTCGACAGAGCACTATCTTTTTCGCTATTCTAGGCTGGGA  
AATAGGTGGAATGCGGAAGTGAGATCGTTTGTGACTTCTACGAAAGGAGAGGGTCTTGGC  
TAACAAAGGGGAGTACGGTGTTCACACAATTGGATAGCACAATGCGGAAGTACACAATAGA  
CTTAATCAATGAGGTGGGCGAGATAGTGGACAAACTGACAGCCAGGCACAACAAGAAGTC  
GCTGTTTCAAGTGATGCATGCCATACCAGAATTGGGTGCAGACTTTGAATTGTTCAACGCGA  
CCAAGATTGTTACCAAGTTGGACGAAAACGGTCAACAAGAAAAGGGCCCTTTACCGGGCA  
CGCTGATGCACTACCTGGTGTTCATATGTGTTGTTTTTGTGGAGTCCGATGCTCAAATAGG  
GTCGGTGAGGTTGAATGCACCACCTGATGATGACTGGGTATATTTTCGAGCAAAGCTGGCTG  
CAATCCCAGATTGCTATTCGACTGGTCCAACCTCAATCTGTACCACTCAACCTGGGAAATG  
GAGAGGGTGATAAAGAAATTGGAGGGCAGTGTATGACACCTGAGGATTATGGTGTATTTGT  
GACTGCGATAGCGGAGGCTATGCCACCATGGTGATAATAGATCCTGAAGGGCAGAGGCAT  
AAGGCAGGGAGAGGGTGTACTCGGGTTGGAGAGGAACAACCTTTCATCAACACTGTGCTAA  
ATGAGGTGTACACCCAATGTGCAGAGATGAGTTTTTCAGAGATTGTTCCGAAGGGAGGCCTA  
CCGATATAAAGATGGCGGTGGCGACGATCACGACGGTGGGTTGAACAGAGCAGACGATGG  
GTACAGGATGTTGGCAATAATGAGGAAAATGAATTTCAAATCAAATTCATAAAGCAGATGG  
TTGCAATGAAAAGTGAGTCTTTAGAAACACTGTGACATCGACAGGTGCTTACGCTAGTCCA  
ATTAGGGCTCTAGTAACATTTGTGAATGGTAGGTGGGAAGGAACAGGACAGGTGCCGATAG  
CCGAGAGAGTAGGAGCGATATTGGATCAAGTTGCGAAGGTACAAAGAAGAGGGGTGGACG  
CACACTTCTGCAATACAATGGCAGTGTGTCTCTTAGTCACTGGTGCAAGGTGAACGAGGAC  
GGCGAGTKGTTAGACTTGCCCGTTATGTAATACATGGCCATCCGGATGACGGAGGCTTTGG  
AGTACCGGATAACATGGGACTGGTCTGGAGACTGAGGGACAGGGTGCCTGAGCCTAAGGTG  
ATTGGGGAAGCGAGAGAAGTGCCGGGAACATTGGCAACTAGGGATTGGTTGTGAGTGTCTT  
GCAGAGAAGTGAGGTCTTTGAACATTGATGTGGACATAGATGAAAAGAAAGTGATAGATAC  
AGCGAAAAGCTCATTGAGGCTTACAGTAGGTATGATTATACAGAAGTGTGAAAGTTCAGAA  
CAGAAATAGTGGGCAAGGCGCCGCTGTGGAACCTCGAAACAACGAGTCGGCCTGGGAAT

TCATGGTGGAAATTCATGGCAATAGAAAAACACGATCTTAAAATTGGCAAATC  
ATGAGGTACCAGGAATTGATACCTTATATGACAGTTGGCGGAAAACCGATGACAAGACAGC  
AACTGGCGAAGCTATGGAGTTGGGTGTGAATACAGAAGTCGTAGACTTCAAAGGAGACGT  
GTATTATAGGAGACTGATATCAGAGCCATTAGCAAAGGTAGTAACTGAGTTCTGCATGGAAAG  
CAATAGCCAGGGAGATATATAGTCTAAAAGAAGGCGAAGAAACCTTCAAAGATCTGTGTTT  
CATGATGTTTCATGAACACAGAGTTCAAGATCTAAGTGCGGGGACTAGATCG  
AGAACGGTGAGAAATCACGCTATTCGGGCGTAGATTAGCGC

>dsRNA2

TGATAAAAATAGAAGTTCAATTCTAATTTTTATCCTAGTGAAGTTGCCACGTTAAACAACCTCT  
GAGACAAAATGGACAAGTGGAAATCCGAAGAAGTATCAAAAAGTGGAGGAGACTTTCCAGC  
TGCTAAGGTCGAGATCTCGATATGTGCAGCAGTTGCAAAAGGATGAAAAGAGAAGAGAG  
TGTGGAATCCATCTCGCTATGACAATTCAAAGGATTACGCAGGAGGAAGAGGATCTATAGGC  
CAGGTGATATCGCACATGCAAGACTACTTGTCAAAGTATAGTGTGGCGCTATGGAAGTGCT  
GTCTGAGGAGAACATAGATGTGTGGTATATGATAATGGGTGATCTTGAAAGAAAAGCGAATC  
TGGGAGAAAACACATGTGGCATAAGAGCGGATTTGAGTGGACACAGATGGCGTGCAGTGT  
GGTGACGCACGCCGGGCAGAACACTGAATTGGCATTAGTGCGACGACAGCTGAGGTGATA  
AACAAAACATGAATGACAGGGCGAAGATACAAAAGCAACGGGATTTGAGATGCCAGAC  
GTCCACAATATGAGGAGTGGAGATGCCGAAGATTTGAAGCGGTTGATACTTGCAGCTGCCG  
GAGGTCAAACAATTACGAGACTTGTGAAGGGTATGAGTCTGTATATAGATATGCTAATA  
TATGGGAACCAAAGTTTGAAGGCCAGATCAAGAACKCTGCCGAATACAATCTGCAGAACG  
TTCTAGCTGCATTTAGGGCCAAGGACAGATCGCATTATGCTCAACCGAACATTCTGACC  
CGTACTTCGTGTTGATGTACTTGATAGGGCTGGAGTACCCTTCAATGGGAACAACATGAAG  
TGCAGAGGGCCACGAGGATTCCAGCCGATGCTGATGACCATTGGGTAATGGTACGCGGGA  
CTCCTAACAAATCGGAGTTAAAGACTGGTCTGACCGCTAATGCGGTGTGGGCGGGTATGGTG  
AGCTACGCATCAGAAATGGAGGTGTCTGATCAGCTAAGCAGTGCCTCATTGTAGCGGCTAG  
CCTATAACCAGAATCGATACCTGAGGGAAAGTGTCTTTACCCAAGTTGGAAGTACAATTGACA  
TAATAAGGCCGGCGTTCCATGAAGTTAGCACTGACGATGCARAGAAACCTTATCTTGACGCG  
AGCGCAGTAGTAGCGTTGGGTAGGGTTCATCAGTTGAATTGTTTCTTAGTGGCAAAGGATCT  
AATAGTGTACGCGCAACATTCAAGTGAGAATGGGCTGAACTACGAGGAGGTGGTGTATGCAG  
TACTTGAAGCAGGATGAAACTGTTATGAGTAGGATGGCTGAATGGTCATCAGGATTATCGCY  
GCWAGRSSCCACGAAGCAGATGAGGTGGATGGGGTGTCTTGACAGAGAAGATATACAGGAT  
CTGAGTGTATATCAATCTTTGAAGCACTATGGCTGTGTGATTCCACAACAAAGAGTGTAGA  
GAGAGGAGCCATTGACTGTCTGGTGAAGGGAAGGAAAGACATGATGCCGAGGAACGGATA  
TATTGAGCTGTTGGACGAAGAAATGCGCAAATTTGGAGTGGACTTGACAGGTCCAGGATA  
CCATCTGGGGCCTTCTCAGTGCAACGAAGGAGTATATGCTCAATGAACAGGTGGGCTCCTAA  
GAAAAGAAATGGGTTGAGAGTGATAGCAGCATGGTACAGCCTTGTGACTACGGTAAGTCA  
GGTAAGAAGGAGGAGGTGAGAAGAAAAAGATTTCTGTTAACCACAGTCAGGCGACCAC  
GTTTGGGAAGTGCCTACAAGGCCTATGCAGAAAGAAAAGCGAAGGAAAGGACACCTACA  
CCTTCTAGTTCGGATGTGGATGAAAGTCCAAAAGGAGGTCTTTGATGGGAAAAGATTGT  
AGGGCTAGAGTTGCCACGCTTTCCTGGCCAGGTAGAGAGGAATGTGACTATGGTTGAGGTA  
AGAAGTAGTAAATTGGGAGCTTCGGAGTACGGTGAAATAAGTGACGCTGGGTATCAGAAG  
TTGAGAGGATAGAGGCAGAGAAGCAAATGTTTCGAGGAAGAGGAAGCACAACAGGAAGTA  
GAATTGGTGCAGATAGACAACGATGGAGCATTCCGAGAAGTGTGAGAAAGAAGGGCAGC  
AAACAGAAGAAGAAAGTGAGTTACGCAGAATTCATGAAAGAAGAGAATCCAATTAATGAT  
GAGCAGCAGGCAATACCGAAGGGAAGGAATACCACGGGGTAATAGATTGGTCATGGGAC  
CCAGACACATTGTGGAGGATAAGGAACAGCAAGTCCGGTAGGTGAGTTCTTAGATGATAAGG  
GCCTAAGCAGAGGGAGCACGATTCTGGGCTCTCAAGAGAAGAATTCTTCGGAGAGGCAGT  
TAGGCACAGTCTGATAATGAAGCACCTAGATGTTACGATAGTGACATTTAAGGAGAGTATGA  
CTAGAGTGCCTATGTATGCACTAGAAATGGCATTTCGTGTGAGAAGTGGTATTCCGACTGAAC  
GCCAGAGAAAGGCAGAATGAAGATAGCTTTGAAAAGGCAAGCTGGGATTAGGTGACGCG  
TATGTGGCAGACCTTGTACACAAGAACGATATGGTGGCCGAGTCATTGTCTAAAGTTCAGAG  
AGAGAGGATCAATAGGCAATACAAGGCAACCAAGAGAGAGATAGCAAGGCTGAAGGAATT

TAGTAGGCGATCTGTCTCAGGCTCTGATAGTTCTAGGGGTATTGTACAGTACTCAATAGAATC  
AGATGCAAGGTCAATCTAGCATGTTTATGCTAGATTGATATCCTAAGTGCGATGTGGGAAGG  
CTCGCATGAGGGACGGTGAGAAAATCACGCTATAGGGGCGTAGATTAGCGCA

>dsRNA3

TGATAAAATTGGAAGTTATCAATCCGTTTTATCCTAGTGAAGTTGCCACGTAAAACAACCTCTG  
AAGATGGCCCAGTTC AAGACTGTGTATGATCTTATGGGCGATGCAGCGAAGGGGAAGTTCTT  
TAGGGGTAAGAGCATGAGCGAAAGTGCAGTTGATGAGATGGAACATGTTGATTGTGAGTTT  
GAAGAATTCAAGTCGTTGGGGTTGGTTGAGAAAAATATCCTTGCAGGAATAAGCATGCCTG  
ACAATTTACAGTTAAGAAGTCAGAGGGTAAGGTCGACATACTTGAGATTGGCATGACAAC  
ACTGGCCAAGGCGGTGAGTGAGCACGGGGGTGTC ACTGATCTAACGCACACAGCTGTCAA  
GAAAATAGATCCTTCCGAGTGTATGGAGACTGGAAATTGGAATATGACACGGCAGCATAA  
TGTATCCTTGGCACA AAGGGATAAAGGCAGACAGGGACAAAGGAGTAATGGGCAGGATAT  
CGGCACAATTCCCGCATTTGAACTCGACAGAGTCAAGCGGTTTTACAAGAACTGCTCAC  
ACATATGCTAGCGCAGAAAACGGACATGACACACGTGTT CATGAAGGGATATCTGATAATGA  
TGGACTTGAACACGTCGGTTGTATT CAGACGCACCATAAGAAGAGCAACGGCAAAGAGAG  
ACA ACTTCTATCCAAACAAGAGTAATGATCATAGGATGGGACTGGTTGGCGCAGCTAGAATA  
GTTGTGGACGCAGATGGATTCTCAGCTGAGGAGCTAGAATCTCTGGACATGATGTGCCAAG  
AGTATCCGACAGTCAAGTACTGCGAAGATAACATATA CAATACATGCAACATGGAGGCAGA  
CAGGTTGGCCATAACAAGTAGCCGTGAGATACCTAGGGCACAGGGTAGAATTCCA ACTCCA  
CTGGAGTTTTACAGGTTGATGACCAGTATTGCATGTAAGCTGGACGCAGTGGAGGACATGTT  
CACAGCCTTCAAATTGATGAGAGGACGGATGGCACACATAAGAGATGTTTACAGGTCATCA  
GACGATAGGAAGTACTCCAGTGGCGTGCCACTTAGCACATGCTACTCAAGGTGCCTTGGAG  
GAGGCACAGTGCACAAGAAAGTCTGTGCAACATAACCCTGCTTACATGTGCTCTAGCGTGGG  
ACTTGTGCGCGACGTA CTGCTAGGTAGGTGCTATGAAGTCGCAGCGTCCATGCTTATAGAGA  
ATTTGGGCGGACTGGGAGACATGATGTGCAGTGGAGGTGCGAGGGCAAGTGGACAATACA  
ATGGGCTACTTAGAGAGTATGGCCTTTCCACAAAAGATGCAACAAAGAATGAGCTGATGTT  
GGCGTGGGAAGGCATAGGCGCAATTGAGTACAAGTGGAGCCCAACTCTCACATGGAAGCC  
ATACATAGTTAAGTTGACAGATGAAATAAGAGGAGGAAATGACGTAGAAATGCCACA ACTG  
TGCTATGAGATCGCGCACATGTTCCACGTAGACAACGCCTGGGGCGCAATACGGGGATATAA  
AGGAATAACAGGAGCAGGTCTAGCAGAACACACCGACATAGGTGAAGGAGCAAGGAAGA  
TGAAAGATGAAAGGCTACGGTATGCAGCAGCTTTCTCTTGGGCAATGGGAGTTAGGCGACA  
GCGGCCCAAGATATTTGTAAATTCTTACGGAATGAAGGAAGTGGCAGTGTCAACTAATGAG  
AGGAAATTTCTGAGGTCAGCAATAGGGGGGTACAAATTCACCAATTTGTCCTACACCCTGGA  
AGAGGATTATGAAGGAAGAGAGGACTGGCTGGAGAACGCAGCAACTGAGCTGTT CAGGTC  
AACTATAGATGGGACCAGGTGTTCCGTGATAATGTCAACGGCTGGAGAATGGCATTATT CAG  
AGACCAAGGAGTCGAAGACTGAAGGAATCGCTGAGTCTCTGATGCAGAAACAAAAGTCTG  
ACAATGTGGACGAGGAGATTCAGAGGATGACCACTGGCAAGTTAATAGAGCCAACAAGCA  
ATGGAGCTGGAGATCTGTT CAGCAAGATGAGCAAGACAAGGTCTGTGGTCCACACACCCAA  
AGTTAAGTTGTCAGGAGGATCGCTGCCAGAGGTGAGAGAGGGAGAGACGAGCTTCAAAAC  
AATACCTGTTCTGTTGATGGCAAGTGTGGTATACATGCAGTTGTTGCAAGCATGAAGGAGG  
CAGGCATGCTTAGAATGGGTGAAGAGAAATTGGTATTTCGACAATTTTGACGGCCAGT  
TCAATGGGCAAAC TTTCCACGATGCACAAACAATAGCACAGGGTCTGAACGAGATAGGGAT  
CGGGCTTAGGCTGTATGATA ATATAACCAGAAAAGGGTGTGAGAGTAACGGA  
CTATGGGGATGTGAAGGAGAATGGTATAGCAATATATAGGT CAGGCAACCAC  
TTTGAGGGTGTAGTGGAGGGCCTGGGCGATACTAGAACAGTGATAGCTAAAGAA  
GGAGGACAGCTGTCAAATGTTCAACAGGTAGACGCACTCAAAGAAATGAGGAG  
ATTCTTTGAATAACACTGAAGCGTCTGCGGGGGT GACTCGACCTTGGTGTGT  
ATCCTGAGGTGCGAGTTGCTGGAGAAAATTCTGAGTGGGGTCAGGGTTAGCGC
